1 **Characterization of pediatric urinary microbiome at species-level resolution**  
2 **indicates variation due to sex, age, and urologic history**

3  
4 Maryellen S Kelly<sup>a,b</sup>, Erin M Dahl<sup>c</sup>, Layla Jeries<sup>d</sup>, \*Tatyana A Sysoeva<sup>d</sup>, \*Lisa Karstens<sup>c,e</sup>

5  
6 <sup>a</sup>Division of Healthcare of Women and Children,  
7 School of Nursing, Duke University  
8 307 Trent Drive  
9 Durham, NC 27710, USA

10  
11 <sup>b</sup>Department of Urology,  
12 Duke University Hospital  
13 40 Duke Medicine Cir Clinic 1G,  
14 Durham, NC 27710, USA

15  
16 <sup>c</sup>Department of Medical Informatics and Clinical Epidemiology,  
17 Oregon Health and Science University  
18 3181 SW Sam Jackson Park Rd  
19 Portland, OR 97239, USA

20  
21 <sup>d</sup>Department of Biological Sciences  
22 University Of Alabama Huntsville  
23 301 Sparkman Dr,  
24 Huntsville, AL 35899, USA

25  
26 <sup>e</sup>Department of Obstetrics and Gynecology  
27 Oregon Health and Science University  
28 3181 SW Sam Jackson Park Rd  
29 Portland, OR 97239, USA

30  
31  
32 Correspondence to: Lisa Karstens, PhD Email: [karstens\\_at\\_ohsu.edu](mailto:karstens_at_ohsu.edu)  
33 Mailcode BICC  
34 Oregon Health and Science University  
35 3181 SW Sam Jackson Park Rd  
36 Portland, OR 97239, USA

37  
38  
39  
40 \*Denotes equal contribution to the presented work

41  
42  
43  
44

## 45 **Extended Summary**

46 **Background:** Recently, associations between recurrent urinary tract infections (UTI) and  
47 the urinary microbiome (urobiome) composition have been identified in adults. However,  
48 little is known about the urobiome in children. We aimed to characterize the urobiome of  
49 children with species-level resolution and to identify associations based on UTI history.

50 **Study design:** Fifty-four children (31 females and 21 males) from 3 months to 5 years of  
51 age participated in the study. Catheterized urine specimens were obtained from children  
52 undergoing a clinically indicated voiding cystourethrogram. To improve the analysis of the  
53 pediatric urobiome, we used a novel protocol using filters to collect biomass from the urine  
54 coupled with synthetic long-read 16S rRNA gene sequencing to obtain culture-  
55 independent species-level resolution data. We tested for differences in microbial  
56 composition between sex and history of UTIs using non-parametric tests on individual  
57 bacteria and alpha diversity measures.

58 **Results:** We detected bacteria in 61% of samples from 54 children (mean age 40.7  
59 months, 57% females). Similar to adults, urobiomes were distinct across individuals and  
60 varied by sex. The urobiome of females showed higher diversity as measured by the  
61 inverse Simpson and Shannon indices but not the Pielou evenness index or number of  
62 observed species ( $p = 0.05$ ,  $p=0.04$ ,  $p = 0.35$ , and  $p = 0.11$ , respectively). Additionally,  
63 several species were significantly overrepresented in females compared to males,  
64 including those from the genera *Anaerococcus*, *Prevotella*, and *Schaalia* ( $p = 0.03$ ,  $0.04$ ,  
65 and  $0.02$ , respectively). Urobiome diversity increased with age, driven mainly by males.  
66 Comparison of children with a history of 1, 2, or 3+ UTIs revealed that urobiome diversity  
67 significantly decreases in the group that experienced 3+ UTIs as measured by the

68 Simpson, Shannon, and Pielou indices ( $p = 0.03$ ,  $p = 0.05$ ,  $p = 0.01$ ). Several bacteria  
69 were also found to be reduced in abundance.

70 **Discussion:** In this study, we confirm that urobiome can be identified from catheter-  
71 collected urine specimens in infants as young as 3 months, providing further evidence  
72 that the pediatric bladder is not sterile. In addition to confirming variations in the urobiome  
73 related to sex, we identify age-related changes in children under 5 years of age, which  
74 conflicts with some prior research. We additionally identify associations with a history of  
75 UTIs.

76 **Conclusions:** Our study provides additional evidence that the pediatric urobiome exists.  
77 The bacteria in the bladder of children appear to be affected by early urologic events and  
78 warrants future research.

79

80

81

82

83

84

85

86

87

88

89

90

91

92

93

94

95

96

97 **Keywords:** pediatric urology, urinary microbiome, urinary tract infections, urobiome

98 **Introduction**

99           The lower urinary tract of an adult human is inhabited by a microbiome composed  
100 of bacteria, fungi, and viruses that are associated with several urological conditions,  
101 including nephrolithiasis, urinary incontinence, urinary urgency, and bladder  
102 overactivity.[1–4] Evidence also suggests that the presence of specific microbes and their  
103 abundance may affect the development and progression of urinary tract infections  
104 (UTI).[1,2,5,6] Several species of the adult urinary microbiome were identified as  
105 protective against uropathogens *in vitro* and in animal models.[5–7] It remains unknown  
106 how the urobiome is initially colonized, how it develops during childhood, and if early  
107 urobiome development and changes can lead to a predisposition to recurrent UTIs.

108           The development of this microbial niche after birth and through childhood has not  
109 been characterized in detail due to several obstacles. One complication is with the  
110 feasibility and ethical concerns in collecting urine samples aseptically from younger  
111 children with catheters or suprapubic aspiration. The current standard of urobiome urinary  
112 collection uses catheterized urine, but this method is deemed too risky to be approved for  
113 children who are not undergoing catheterization for a medically directed purpose.[8] The  
114 alternative to this is obtaining voided clean-catch urine, which is complicated by the  
115 transition of children from the diapered stage to the toilet-trained stage, leaving younger  
116 children hard to sample. A second complication is that children have smaller bladder  
117 capacities than adults.[9–11] Thus, it has been assumed that children’s urobiome  
118 microbial abundance will be smaller and more difficult to detect. Kassiri et al reported  
119 microbial load in pediatric males, which was on average less when compared to the adult  
120 male urobiome[13].

121 Despite these complications, there have been seven pediatric urobiome studies  
122 within the last four years that discuss the development of the urobiome from ~2 weeks to  
123 18 years of age for both sexes.[12–18] There is little overlap among the subgroups  
124 analyzed and the methods used (**Table S1**). Most studies used routine short amplicon  
125 16S rRNA gene sequencing to record bacterial urobiome composition. Two of these  
126 reports also used enhanced quantitative urine culture (EQUC) or a custom modification  
127 of this to isolate species from pediatric urine samples, thus providing species-level  
128 resolution of culturable microbes.[16, 17] This improved taxonomic resolution is critical  
129 for understanding urobiome functioning, as identified species may be relevant in  
130 discovering any predisposition for UTI.

131 In this pilot study, we sought to improve the resolution of the compositional analysis  
132 of the pediatric urobiome. We implemented methods of microbiome collection from other  
133 well-studied low-biomass niches and collected urine-suspended cells via filtering.[19–21]  
134 In addition, we used a synthetic long-read sequencing method to establish better  
135 taxonomic resolution of bacteria based on full-length 16S rRNA gene sequences.[22]  
136 Using this protocol, we analyzed bacterial composition of the urobiome to the species  
137 level in infants and young children. We detected differences in microbe diversity and  
138 presence by age, sex, and history of UTI.

139

## 140 **Methods**

### 141 Clinical population

142 The research study was approved by Duke University Medical Center Institutional  
143 Review Board under protocol #Pro0010031. From 2018-2021 children from birth to age

144 5 years who had a voiding cystourethrogram (VCUG) conducted for a clinical indication  
145 were offered enrollment. At baseline, parents or guardians (hereafter “parents”) granted  
146 permission for a urine sample to be collected and their child’s electronic medical record  
147 to be accessed. Parents provided written consent for their child to be included in the study.  
148 Identifiers presented in plots and data are deidentified and do not represent patient or  
149 research subject identifiers.

150 Demographic variables collected included age (months), race, and sex. Children  
151 who utilized intermittent catheterization to empty their bladder or who had neurogenic  
152 bladder were excluded. Clinical variables included the number of confirmed UTIs using  
153 the American Academy of Pediatrics definition for UTI, vesicoureteral reflux status (VUR)  
154 and history of antibiotic use.[23] Chart review from our institution was used to identify  
155 historical UTIs, along with pediatric office records and outside facility records, if an  
156 interview with the family indicated a UTI may have occurred outside our institution. These  
157 records were then examined to verify if they met the definition of UTI from the American  
158 Academy of Pediatrics.

159

### 160 Specimen collection

161 Urine specimens were collected from catheterized urine (minimum volume 10 mL)  
162 into a sterile urine specimen cup before introducing iodinated contrast for the VCUG  
163 procedure. Urine was processed within 24 hours of collection via vacuum filtration on 0.22  
164  $\mu\text{m}$  filters. The urine biomass, collected on these filters, was stored in a  $-80^{\circ}\text{C}$  freezer  
165 until all samples were ready for DNA extraction.

166

167 DNA extraction, preparation, and sequencing

168 DNA was isolated from 0.5" x 0.5" fragments of the filters. 1ml of phosphate-  
169 buffered saline (PBS) was used to wash the biomass off the filter. DNA isolation was  
170 performed using an optimized version of the QIAamp Fast DNA Stool Mini Kit (Cat No./ID:  
171 51604) protocol supplemented with 60 mg/mL lysozyme (Thermo Fisher Scientific, Grand  
172 Island, NY).[24–26] The DNA samples were quantified (Qubit Quant-iT PicoGreen kit)  
173 and divided into aliquots and then sequenced in triplicates by LoopGenomics (now –  
174 Element Biosciences). The LoopGenomics technology uses unique molecular identifiers  
175 to build a scaffold of high-quality Illumina short reads that cover the full length of the 16S  
176 rRNA gene.[22] This approach minimizes biases found in traditional amplicon sequencing,  
177 such as amplification bias of certain taxa and amplification of contaminants. This is  
178 especially significant in samples of low biomass, which is expected in children's urine  
179 samples. PBS-treated filters were used as negative controls, and a mock community  
180 dilutions series as positive controls to determine background noise and detection limits.

181

182 Microbiome data processing

183 The sequencing data was processed and summarized into bacterial taxa. Raw  
184 sequences were processed using DADA2, following recent recommendations for  
185 modifications to accommodate synthetic long reads.[22, 27] Taxonomy was assigned  
186 using Bayesian LCA-based Taxonomic Classification Method (BLCA) with the NCBI 16S  
187 microbial database (downloaded on 11/5/2021).[28] To broadly assess the characteristics  
188 of microbial communities, we used a suite of analyses designed for 16S rRNA sequencing  
189 available in R, primarily in the phyloseq and vegan packages.[29] The evenness and

190 richness of each individual's urinary microbiome were summarized using alpha diversity  
191 metrics (number of observed species/genera, the Shannon Index, and Inverse Simpson  
192 Index). The alpha and beta diversity measures were compared between groups using  
193 standard statistical tests (non-parametric Wilcoxon rank sum for alpha diversity and  
194 PERMANOVA for beta diversity). Differences in relative abundance of individual taxa  
195 were assessed between groups when the distribution across the dataset was sufficient.

## 196 **Results**

197 Fifty-four urine samples were collected, with 31 (57%) from females and 23 (43%)  
198 from males (**Table 1**). The mean age of the children was 40.7 months (range 3-130  
199 months). Age was significantly different between sexes, with females being, on average  
200 51.4 months and males being 26.2 months ( $p = 0.001$ ). Due to this, for the between sex  
201 analysis, we limited the data to individuals less than 60 months of age. Thirty-two percent  
202 of children in the study reported greater than 3 UTIs, 48% had 1-2 UTIs, and 17% had  
203 never had a UTI. Sixty-five percent were currently using a prophylactic antibiotic to reduce  
204 their risk of UTI at the time of urine collection, 9% had never used an antibiotic for any  
205 reason, and the remaining had intermittently used antibiotics in the past as treatment or  
206 prophylaxis. The VUR status at the time of sample collection was 65% (36) had confirmed  
207 VUR, 11% (6) had a history of VUR that had resolved, and 24% (13) had never had VUR.

208

### 209 *Feasibility of synthetic long-read sequencing of bacteria in pediatric catheterized urines*

210 Sequencing resulted in 0 – 318,342 reads per sample, with a mean of 17,207 reads.  
211 All negative controls failed to produce sequences. To determine the minimum acceptable  
212 sampling depth per sample, the data were randomly subsampled to various sampling



213 depths ranging from 100 to 10,000. The subsampled data were evaluated based on the  
214 relative abundance of individual taxa and alpha diversity measures. We noted no  
215 significant differences between these measures of the unrarefied and rarefied data at  
216 various thresholds down to 500 reads per sample (**Fig. S1**). We additionally evaluated  
217 our mock microbial positive-control samples, which showed the expected composition at  
218 the 500 reads per sample threshold. Therefore, we used the threshold of 500 reads per  
219 sample as the minimum number of reads to declare a sample as sequence positive and  
220 as a subsampling depth for analysis. 33 of the 54 urine samples (61%) provided  
221 sequencing data at this threshold and were deemed sequence-positive and subject to  
222 further analysis. The overall summary for sequence-positive and sequence-negative  
223 samples is given in **Table 1**. There were no significant associations between demographic  
224 or clinical variables in individuals whose samples were sequence-positive versus  
225 sequence-negative. The sample DNA concentration was significantly increased in the  
226 sequence positive samples (5.23 +/- 6.28 ng/ml in sequence negative; 11.85 +/- 11.47  
227 ng/ml in sequence positive samples,  $p = 0.02$ ).

228 Each DNA sample was aliquoted for sequencing in triplicate and demonstrated  
229 little variability compared to that seen across samples. Stacked bar plots representing the  
230 relative abundance of bacteria in triplicate of four samples are shown in **Figure 1A**.  
231 Overall variability across different taxa in each triplicate set is also low (**Fig. 1B**).

232 All additional analyses were performed using a single replicate of each of the 33  
233 sequence-positive samples.

234

235 *Residential bacterial DNA detected in majority of pediatric catheterized urines*

236 Samples from the female and male sexes had polymicrobial urinary microbiomes  
237 composed of several bacteria (**Fig. 2A**). We detected an insignificant increase of unique  
238 species in females (median 31 species, IQR 18) compared to males (median 16.5 species,  
239 IQR 14.25, p-value 0.11). Overall, there was high variability amongst individuals (3 to 42  
240 species, and 2 to 36 genera per sample).

241 In boys, the dominant taxa included *Peptoniphilus*, *Ezakiella*, *Sphingomonas*,  
242 *Ralstonia*, and *Anaerococcus* (**Fig. S2**). In girls, the most abundant were *Prevotella*,  
243 *Peptoniphilus*, *Anaerococcus*, *Ezakiella*, and *Streptococcus* (**Fig. S2**). These  
244 predominant taxa do not include taxa commonly associated with adult male and female  
245 urobiomes – *Lactobacillus* in females and *Staphylococcus* in males. These taxa were  
246 present in a small number of samples (2 for *Lactobacillus*, 8 for *Staphylococcus*), in low  
247 abundances (maximum 1.0% for *Lactobacillus*, 6.8% for *Staphylococcus*), and not  
248 associated with a specific sex. Of note, *Anaerococcus* and *Prevotella* were significantly  
249 increased in females compared to males (p-value 0.03 and 0.04, respectively; **Fig. 2B**).  
250 Additionally, *Schaalia* was also significantly increased in females ( $p = 0.02$ ), though it was  
251 only detected in 10 samples (9 female samples, one male sample) at low relative  
252 abundance (maximum 5.6%). These genera were primarily attributed to the specific  
253 species of *Prevotella timonensis*, *Schaalia turincensis*, and *Anaerococcus lactolyticus*.  
254 We detected a low abundance of *Actinotignum schaalii* in 10 samples, in which 9 were  
255 females.

256

257 *Urobiome diversity is higher in girls and increases with age in boys*

258 Overall diversity was higher in samples from the females as measured with inverse  
259 Simpson ( $p=0.05$ ) and Shannon ( $p=0.04$ ) metrics but not by the Pielou evenness ( $p =$   
260  $0.35$ ) or observed species ( $p = 0.11$ ) (**Fig. 2C**). Increased age was also associated with  
261 increased diversity ( $\rho = 0.45$ ,  $p = 0.02$ , **Fig. 2D**). In samples from females the diversity  
262 is largely unchanged across age ( $\rho = -0.15$ ,  $p = 0.62$ ), whereas, in males, diversity  
263 increases with age (**Fig. 2D, Table 1**) with a correlation factor of  $0.54$  and  $p = 0.07$ .

264

#### 265 *Recurrency of UTI results in reduced urobiome diversity*

266 There was variation in the number of UTIs a child had experienced to date (**Table**  
267 **1**). When grouped by their history of UTI, there were significant differences in the Inverse  
268 Simpson index ( $p = 0.03$ ), the Shannon index ( $p = 0.05$ ), and Pielou index ( $p = 0.01$ ). The  
269 group with a history of 3 or more UTIs demonstrated significantly reduced urobiome  
270 diversity compared to those with a history of only 1 UTI (**Fig. 3A**). The four children who  
271 had never had a UTI were excluded from this analysis. When individual taxa were  
272 compared among the groups of patients with 1, 2, or 3 or more UTIs, several taxa were  
273 decreased in individuals with 3 or more UTIs compared to those with 2 or fewer (**Fig. 3B**).  
274 Those are genera of *Enterococcus* (significant decrease between 2 UTIs and 1 UTIs,  $p =$   
275  $0.05$ ), *Lawsonella* (significant decrease between 3+ UTIs compared to 1 UTI,  $p = 0.05$ ;  
276 decrease between 3+ UTIs compared to 2,  $p = 0.07$ ), and *Corynebacterium* (significant  
277 decrease between 1 UTI compared to 3+,  $p = 0.05$ ; decrease between 2 UTIs compared  
278 to 3+,  $p = 0.07$ ). At the Phyla level, we noted a decrease in Bacteroidetes and an increase  
279 in Proteobacteria in children with had 3+ UTIs, however, these changes did not reach  
280 significance ( $p=0.17$ ,  $p=0.11$ , respectively), likely due to our small sample size.

## 281 Discussion

282 Results presented here show that even in the low biomass catheter-collected  
283 urinary samples of children, we can obtain species-level compositional data without using  
284 full shotgun metagenomic sequencing. Additionally, this method expands previously  
285 successfully applied species-resolution methods (EQUIC and standard urine culture) to  
286 obtaining species-level information for unculturable urinary constituents.

287 Prior studies established that adult urobiomes differ significantly by sex and have  
288 different predominant taxa.[30-33] It is not clear whether these sex differences develop  
289 early in infancy due to variable anatomy and early hormonal surges or later in childhood  
290 due to the hormonal changes of puberty or a combination of these factors. From the  
291 microbial ecology perspective, the bladder represents a unique set of conditions and  
292 selective pressures that make it clearly distinct from the surrounding environments of skin  
293 niches, vaginal and gut microbiomes. These environmental pressures (low oxygen,  
294 fluctuating pH and nutrient composition, high concentration of chemicals like urea) may  
295 define urobiome composition. In the absence of hormonal changes, one might  
296 hypothesize that female and male sex urobiomes may be compositionally close before  
297 puberty. The data we obtained contradicts such a hypothesis, showing a distinction  
298 between female and male sex urobiome prior to puberty hormonal changes. Interestingly,  
299 there are several taxa that appear to be common at high abundances between the two  
300 sexes: *Peptonophilus* and *Anaerococcus*.

301 There are unique sex hormonal differences that occur before birth and within the  
302 first year of life, but in our cohort, we did not have representation of infants below one  
303 year of age. In the next four years of life, we observed increased urobiome diversity that

304 was driven by the male sex's samples. This observation correlates with the hypothesis  
305 that the different lengths of the female and male urethra may influence the rate of diversity  
306 change after birth. The shorter female sex urethra may allow for early population of the  
307 urobiome, whereas the longer male sex urethra slows the rate of developing a diverse  
308 urobiome. This may imply that the bladder niche has some equilibrium or overall capacity  
309 for diversity.

310 Prior studies from Storm and colleagues did not observe age-related change,  
311 which is likely due to collapsing the overall age group of 0-3 year old children and  
312 comparing those with the older cohort only.[16] We did not observe the changes in the  
313 female sex's urobiome diversity observed during puberty that was found in that study.  
314 This was likely due to the lack of a comparable older age group of females. In a sample  
315 of 85 children under 48 months of age, Kinneman et al. found that diversity increased with  
316 age.[14] This is confirmed in our results. Our results also support Fredsgaard et al.'s  
317 results from 30 clean catch voided urine samples of prepubertal children where females  
318 had higher richness and diversity in their urinary microbiome than males.[18]

319 Considering the composition in the pediatric samples we presented, some  
320 prominent genera from the adult urobiome are not prominent in children. For example,  
321 in adult males *Corynebacterium* and *Staphylococcus* are frequently abundant in the  
322 urobiome.[34–36] However, we did not detect these genera robustly in male samples;  
323 they were only identified in a few samples at low abundance except for in one instance.  
324 Moreover, genera previously classified as *Lactobacilli*[38] that are the most common  
325 genera in adult female sex urobiomes were not found robustly in our dataset, with only 2  
326 samples having a *Lactobacillus* genera, each at a low abundance. This is consistent with

327 the observations made by Storm et al. from their data that Lactobacilli appear in female  
328 populations during puberty.[16] There are abundant taxa that appear to be present in  
329 early childhood that may also remain prevalent in adult bladders, for example, *Prevotella*,  
330 *Streptococci*, and *Porphyromonas*. Our population in this study was specific and  
331 consisted of children referred for a VCUG due to urologic concerns with the majority  
332 having a history of VUR. Results from this data may not be fully generalizable to larger  
333 populations of healthy children, but the aims of this study were still achieved. Due to this,  
334 60.6% of all sequence-positive samples (**Table 1**) came from children who were taking  
335 prophylactic doses of antibiotics as a measure of preventing recurrent febrile UTIs.  
336 Surprisingly, prophylactic use of antibiotics did not result in the elimination of the urobiome.

337 Males below 1 year of age are more susceptible to UTI.[39] Around 1 year of age,  
338 females become more at risk for UTI compared to males, up until the late stages of life  
339 when the immune system of both sexes weakens due to senescence. We observed early  
340 male urobiome had low bacterial diversity. However within our cohort we did not have  
341 males with 'sequence-positive' samples under one year of age.

342 Comparing patient cohorts who have had different numbers of UTIs showed that  
343 the diversity was reduced in those individuals who had 3 and more UTIs. There are  
344 several possible explanations for such observations, such as alterations of the urobiome  
345 due to antibiotic exposure and changes associated with prior overgrowth of uropathogens  
346 during the UTIs. In our dataset, only 2 samples were 'sequence-positive' from children  
347 who had never used antibiotics, while all other 'sequence-positive' samples were from  
348 children who were either currently taking prophylactic antibiotics or were treated with  
349 antibiotics previously. We do not have enough statistical power to establish significance.

350 Still, there was no difference observed in the diversity of the urobiome between those with  
351 prior antibiotic use and current prophylactic antibiotic use. This observation suggests that  
352 if there is a reduction of the diversity or other parameters in the urobiome due to antibiotic  
353 treatments (including current prophylactic use), the changes might be smaller than those  
354 associated with UTI-caused shifts.

355 Our pilot study has some limitations, including the use of convenience sampling  
356 and a small number of subjects. We did not capture the circumcision status of male sex  
357 children; recent studies have identified a microbiome on the foreskin, which may have  
358 been detected in catheterized urine, especially in younger children with physiological  
359 phimosis whose foreskin can't be adequately retracted for catheterization directly into the  
360 urethra.[30] We did not run short amplicon sequencing in parallel with LoopSeq due to  
361 concerns of the limited amount of DNA extracted. This study also had strengths, including  
362 using a filtering technique that does not utilize a high-speed centrifuge, potentially  
363 expanding the number of centers where urine processing could be done. We additionally  
364 used synthetic long-read sequencing that enabled species-level identification. Such  
365 methodology balances access and cost between newly established methods for obtaining  
366 compositional data for urine samples for microbiome analysis.

367 In summary, our study confirms prior observations that even infants have complex  
368 urobiomes. In our cohort, we identified the urobiome in children as young as 3 months  
369 and obtained species-level taxonomic resolution by using culture-independent full-length  
370 16S sequencing. We showed that the urobiome composition varies amongst individuals  
371 and demonstrates notable changes between sexes and with age. We identified specific  
372 species overrepresented in females and patients with repeated UTIs. With observed

373 changes in urobiome diversity levels, our study suggests a connection between  
374 decreased overall urobiome diversity and recurrent UTIs in children. Overall, our pilot  
375 results show the feasibility of the species-level urobiome investigation in future broader  
376 cross-sectional as well as longitudinal studies exploring urobiome stability within an  
377 individual, changes with health status alterations, and drug applications.

378

### 379 **Funding**

380 This work was funded by the National Institutes of Health (NIH) CAIRIBU U24 Interactions  
381 Core award U24-DK-127726 through the Collaboration Awards Program. LK was also  
382 supported by NIH NIDDK Award K01 DK116706. The contents of the article are solely  
383 our responsibility and do not represent the official views of the NIH or of any other funding  
384 agency.

385

### 386 **References**

- 387 [1] T. E. Finucane, "'Urinary Tract Infection' and the Microbiome," *Am. J. Med.*, vol. 130, no. 3,  
388 pp. e97–e98, Mar. 2017, doi: 10.1016/j.amjmed.2016.08.018.
- 389 [2] A. Hiergeist and A. Gessner, "Clinical implications of the microbiome in urinary tract  
390 diseases," *Curr. Opin. Urol.*, vol. 27, no. 2, pp. 93–98, Mar. 2017, doi:  
391 10.1097/MOU.0000000000000367.
- 392 [3] K. Thomas-White, M. Brady, A. J. Wolfe, and E. R. Mueller, "The bladder is not sterile:  
393 History and current discoveries on the urinary microbiome," *Curr. Bladder Dysfunct. Rep.*,  
394 vol. 11, no. 1, pp. 18–24, Mar. 2016, doi: 10.1007/s11884-016-0345-8.
- 395 [4] S. A. Whiteside, H. Razvi, S. Dave, G. Reid, and J. P. Burton, "The microbiome of the urinary  
396 tract--a role beyond infection," *Nat. Rev. Urol.*, vol. 12, no. 2, pp. 81–90, Feb. 2015, doi:  
397 10.1038/nrurol.2014.361.
- 398 [5] C. H. Song *et al.*, "Lactobacillus crispatus Limits Bladder Uropathogenic E. coli Infection by  
399 Triggering a Host Type I Interferon Response," *Proc. Natl. Acad. Sci. U. S. A.*, vol. 119, no.  
400 33, p. e2117904119, Aug. 2022, doi: 10.1073/pnas.2117904119.
- 401 [6] J. A. Johnson *et al.*, "Commensal Urinary Lactobacilli Inhibit Major Uropathogens In Vitro  
402 With Heterogeneity at Species and Strain Level," *Front. Cell. Infect. Microbiol.*, vol. 12, p.  
403 870603, 2022, doi: 10.3389/fcimb.2022.870603.



- 404 [7] R. Abdul Rahim *et al.*, “Potential Antioxidant and Anti-Inflammatory Effects of *Spilanthes*  
405 *acmella* and Its Health Beneficial Effects: A Review,” *Int. J. Environ. Res. Public Health*, vol.  
406 18, no. 7, p. 3532, Mar. 2021, doi: 10.3390/ijerph18073532.
- 407 [8] L. Brubaker *et al.*, “Forming Consensus To Advance Urobiome Research,” *mSystems*, vol. 6,  
408 no. 4, p. e0137120, Aug. 2021, doi: 10.1128/mSystems.01371-20.
- 409 [9] M. Kaefer *et al.*, “Estimating normal bladder capacity in children,” *J. Urol.*, vol. 158, no. 6,  
410 pp. 2261–2264, Dec. 1997, doi: 10.1016/s0022-5347(01)68230-2.
- 411 [10] S. A. Koff, “Estimating bladder capacity in children,” *Urology*, vol. 21, no. 3, p. 248, Mar.  
412 1983, doi: 10.1016/0090-4295(83)90079-1.
- 413 [11] R. M. Berger, M. Maizels, G. C. Moran, J. J. Conway, and C. F. Firlit, “Bladder capacity  
414 (ounces) equals age (years) plus 2 predicts normal bladder capacity and aids in diagnosis of  
415 abnormal voiding patterns,” *J. Urol.*, vol. 129, no. 2, pp. 347–349, Feb. 1983, doi:  
416 10.1016/s0022-5347(17)52091-1.
- 417 [12] C. S. Forster, K. Panchapakesan, C. Stroud, P. Banerjee, H. Gordish-Dressman, and M. H.  
418 Hsieh, “A cross-sectional analysis of the urine microbiome of children with neuropathic  
419 bladders,” *J. Pediatr. Urol.*, vol. 16, no. 5, p. 593.e1-593.e8, Oct. 2020, doi:  
420 10.1016/j.jpuro.2020.02.005.
- 421 [13] B. Kassiri *et al.*, “A Prospective Study of the Urinary and Gastrointestinal Microbiome in  
422 Prepubertal Males,” *Urology*, vol. 131, pp. 204–210, Sep. 2019, doi:  
423 10.1016/j.urology.2019.05.031.
- 424 [14] L. Kinneman *et al.*, “Assessment of the Urinary Microbiome in Children Younger Than 48  
425 Months,” *Pediatr. Infect. Dis. J.*, vol. 39, no. 7, pp. 565–570, Jul. 2020, doi:  
426 10.1097/INF.0000000000002622.
- 427 [15] D. Vitko *et al.*, “Urinary Tract Infections in Children with Vesicoureteral Reflux Are  
428 Accompanied by Alterations in Urinary Microbiota and Metabolome Profiles,” *Eur. Urol.*,  
429 vol. 81, no. 2, pp. 151–154, Feb. 2022, doi: 10.1016/j.eururo.2021.08.022.
- 430 [16] D. W. Storm, H. L. Copp, T. M. Halverson, J. Du, D. Juhr, and A. J. Wolfe, “A Child’s urine is  
431 not sterile: A pilot study evaluating the Pediatric Urinary Microbiome,” *J. Pediatr. Urol.*,  
432 vol. 18, no. 3, pp. 383–392, Jun. 2022, doi: 10.1016/j.jpuro.2022.02.025.
- 433 [17] M. Hadjifrangiskou *et al.*, “Defining the Infant Male Urobiome and Moving Towards  
434 Mechanisms in Urobiome Research,” *Res. Sq.*, p. rs.3.rs-2618137, Mar. 2023, doi:  
435 10.21203/rs.3.rs-2618137/v1.
- 436 [18] L. Fredsgaard *et al.*, “Description of the voided urinary microbiota in asymptomatic  
437 prepubertal children - A pilot study,” *J. Pediatr. Urol.*, vol. 17, no. 4, p. 545.e1-545.e8, Aug.  
438 2021, doi: 10.1016/j.jpuro.2021.03.019.
- 439 [19] C. Zhang *et al.*, “The Bacterial Community Diversity of Bathroom Hot Tap Water Was  
440 Significantly Lower Than That of Cold Tap and Shower Water,” *Front. Microbiol.*, vol. 12, p.  
441 625324, 2021, doi: 10.3389/fmicb.2021.625324.
- 442 [20] Y.-W. Yan, B. Zou, T. Zhu, W. N. Hozzein, and Z.-X. Quan, “Modified RNA-seq method for  
443 microbial community and diversity analysis using rRNA in different types of environmental  
444 samples,” *PLoS One*, vol. 12, no. 10, p. e0186161, 2017, doi:  
445 10.1371/journal.pone.0186161.

- 446 [21] M. B. Waak, R. M. Hozalski, C. Hallé, and T. M. LaPara, “Comparison of the microbiomes of  
447 two drinking water distribution systems-with and without residual chloramine  
448 disinfection,” *Microbiome*, vol. 7, no. 1, p. 87, Jun. 2019, doi: 10.1186/s40168-019-0707-5.
- 449 [22] B. J. Callahan, D. Grinevich, S. Thakur, M. A. Balamotis, and T. B. Yehezkel, “Ultra-accurate  
450 microbial amplicon sequencing with synthetic long reads,” *Microbiome*, vol. 9, no. 1, p.  
451 130, Jun. 2021, doi: 10.1186/s40168-021-01072-3.
- 452 [23] Subcommittee on Urinary Tract Infection, Steering Committee on Quality Improvement  
453 and Management and K. B. Roberts, “Urinary tract infection: clinical practice guideline for  
454 the diagnosis and management of the initial UTI in febrile infants and children 2 to 24  
455 months,” *Pediatrics*, vol. 128, no. 3, pp. 595–610, Sep. 2011, doi: 10.1542/peds.2011-  
456 1330.
- 457 [24] I. Allali *et al.*, “A comparison of sequencing platforms and bioinformatics pipelines for  
458 compositional analysis of the gut microbiome,” *BMC Microbiol.*, vol. 17, no. 1, p. 194, Sep.  
459 2017, doi: 10.1186/s12866-017-1101-8.
- 460 [25] M. A. Azcarate-Peril *et al.*, “An Attenuated *Salmonella enterica* Serovar Typhimurium  
461 Strain and Galacto-Oligosaccharides Accelerate Clearance of *Salmonella* Infections in  
462 Poultry through Modifications to the Gut Microbiome,” *Appl. Environ. Microbiol.*, vol. 84,  
463 no. 5, pp. e02526-17, Mar. 2018, doi: 10.1128/AEM.02526-17.
- 464 [26] L. Guadamuro, M. A. Azcárate-Peril, R. Tojo, B. Mayo, and S. Delgado, “Use of high  
465 throughput amplicon sequencing and ethidium monoazide dye to track microbiota  
466 changes in an equol-producing menopausal woman receiving a long-term isoflavones  
467 treatment,” *AIMS Microbiol.*, vol. 5, no. 1, pp. 102–116, 2019, doi:  
468 10.3934/microbiol.2019.1.102.
- 469 [27] B. J. Callahan, P. J. McMurdie, M. J. Rosen, A. W. Han, A. J. A. Johnson, and S. P. Holmes,  
470 “DADA2: High-resolution sample inference from Illumina amplicon data,” *Nat. Methods*,  
471 vol. 13, no. 7, Art. no. 7, Jul. 2016, doi: 10.1038/nmeth.3869.
- 472 [28] X. Gao, H. Lin, K. Revanna, and Q. Dong, “A Bayesian taxonomic classification method for  
473 16S rRNA gene sequences with improved species-level accuracy,” *BMC Bioinformatics*, vol.  
474 18, no. 1, p. 247, May 2017, doi: 10.1186/s12859-017-1670-4.
- 475 [29] P. J. McMurdie and S. Holmes, “phyloseq: An R Package for Reproducible Interactive  
476 Analysis and Graphics of Microbiome Census Data,” *PLOS ONE*, vol. 8, no. 4, p. e61217,  
477 Apr. 2013, doi: 10.1371/journal.pone.0061217.
- 478 [30] K. Mishra *et al.*, “Characterization of Changes in Penile Microbiome Following Pediatric  
479 Circumcision,” *Eur. Urol. Focus*, vol. 9, no. 4, pp. 669–680, Jul. 2023, doi:  
480 10.1016/j.euf.2022.12.007.
- 481 [31] T. K. Price *et al.*, “Temporal Dynamics of the Adult Female Lower Urinary Tract  
482 Microbiota,” *mBio*, vol. 11, no. 2, pp. e00475-20, Apr. 2020, doi: 10.1128/mBio.00475-20.
- 483 [32] R. S. Roth, M. Liden, and A. Huttner, “The urobiome in men and women: a clinical review,”  
484 *Clin. Microbiol. Infect. Off. Publ. Eur. Soc. Clin. Microbiol. Infect. Dis.*, vol. 29, no. 10, pp.  
485 1242–1248, Oct. 2023, doi: 10.1016/j.cmi.2022.08.010.
- 486 [33] A. Zuber, A. Peric, N. Pluchino, D. Baud, and M. Stojanov, “Human Male Genital Tract  
487 Microbiota,” *Int. J. Mol. Sci.*, vol. 24, no. 8, p. 6939, Apr. 2023, doi: 10.3390/ijms24086939.

- 488 [34] M. Colella *et al.*, “An Overview of the Microbiota of the Human Urinary Tract in Health and  
489 Disease: Current Issues and Perspectives,” *Life Basel Switz.*, vol. 13, no. 7, p. 1486, Jun.  
490 2023, doi: 10.3390/life13071486.
- 491 [35] D. A. Lewis *et al.*, “The human urinary microbiome; bacterial DNA in voided urine of  
492 asymptomatic adults,” *Front. Cell. Infect. Microbiol.*, vol. 3, p. 41, 2013, doi:  
493 10.3389/fcimb.2013.00041.
- 494 [36] P. Bajic *et al.*, “Male Bladder Microbiome Relates to Lower Urinary Tract Symptoms,” *Eur.*  
495 *Urol. Focus*, vol. 6, no. 2, pp. 376–382, Mar. 2020, doi: 10.1016/j.euf.2018.08.001.
- 496 [37] E. Shrestha *et al.*, “Profiling the Urinary Microbiome in Men with Positive versus Negative  
497 Biopsies for Prostate Cancer,” *J. Urol.*, vol. 199, no. 1, pp. 161–171, Jan. 2018, doi:  
498 10.1016/j.juro.2017.08.001.
- 499 [38] J. Zheng *et al.*, “A taxonomic note on the genus *Lactobacillus*: Description of 23 novel  
500 genera, emended description of the genus *Lactobacillus* Beijerinck 1901, and union of  
501 *Lactobacillaceae* and *Leuconostocaceae*,” *Int. J. Syst. Evol. Microbiol.*, vol. 70, no. 4, pp.  
502 2782–2858, Apr. 2020, doi: 10.1099/ijsem.0.004107.
- 503 [39] N. Shaikh, N. E. Morone, J. E. Bost, and M. H. Farrell, “Prevalence of urinary tract infection  
504 in childhood: a meta-analysis,” *Pediatr Infect J*, vol. 27, no. 4, pp. 302–8, Apr. 2008, doi:  
505 10.1097/INF.0b013e31815e4122.  
506  
507



|                                          |                                     |             |             |             |             |             |             |             |
|------------------------------------------|-------------------------------------|-------------|-------------|-------------|-------------|-------------|-------------|-------------|
|                                          | <b>Unknown</b>                      | <b>1</b>    | <b>1.9</b>  | <b>0</b>    | <b>0</b>    | <b>1</b>    | <b>3</b>    |             |
|                                          | <b>No</b>                           | <b>18</b>   | <b>33.3</b> | <b>6</b>    | <b>28.6</b> | <b>12</b>   | <b>36.4</b> |             |
|                                          | <b>Yes</b>                          | <b>35</b>   | <b>64.8</b> | <b>15</b>   | <b>71.4</b> | <b>20</b>   | <b>60.6</b> |             |
| <b>Current Antibiotic Type</b>           |                                     |             |             |             |             |             |             | <b>0.72</b> |
|                                          | <b>Unknown</b>                      | <b>19</b>   | <b>35.2</b> | <b>6</b>    | <b>28.6</b> | <b>13</b>   | <b>39.4</b> |             |
|                                          | <b>Bactrim and Nitrofurantoin</b>   | <b>1</b>    | <b>1.9</b>  | <b>0</b>    | <b>0</b>    | <b>1</b>    | <b>3</b>    |             |
|                                          | <b>Furadantin</b>                   | <b>7</b>    | <b>13</b>   | <b>4</b>    | <b>19</b>   | <b>3</b>    | <b>9.1</b>  |             |
|                                          | <b>Keflex</b>                       | <b>3</b>    | <b>5.6</b>  | <b>2</b>    | <b>9.5</b>  | <b>1</b>    | <b>3</b>    |             |
|                                          | <b>Macrochantin</b>                 | <b>5</b>    | <b>9.3</b>  | <b>2</b>    | <b>9.5</b>  | <b>3</b>    | <b>9.1</b>  |             |
|                                          | <b>Septra</b>                       | <b>18</b>   | <b>33.3</b> | <b>7</b>    | <b>33.3</b> | <b>11</b>   | <b>33.3</b> |             |
|                                          | <b>Sulfatrim</b>                    | <b>1</b>    | <b>1.9</b>  | <b>0</b>    | <b>0</b>    | <b>1</b>    | <b>3</b>    |             |
| <b>UTI History (lifetime) (n, %)</b>     |                                     |             |             |             |             |             |             | <b>0.74</b> |
|                                          | <b>Unknown</b>                      | <b>2</b>    | <b>3.7</b>  | <b>1</b>    | <b>4.8</b>  | <b>1</b>    | <b>3</b>    |             |
|                                          | <b>0</b>                            | <b>9</b>    | <b>16.7</b> | <b>5</b>    | <b>23.8</b> | <b>4</b>    | <b>12.1</b> |             |
|                                          | <b>1</b>                            | <b>14</b>   | <b>25.9</b> | <b>4</b>    | <b>19</b>   | <b>10</b>   | <b>30.3</b> |             |
|                                          | <b>2</b>                            | <b>12</b>   | <b>22.2</b> | <b>4</b>    | <b>19</b>   | <b>8</b>    | <b>24.2</b> |             |
|                                          | <b>3 or more</b>                    | <b>17</b>   | <b>31.5</b> | <b>7</b>    | <b>33.3</b> | <b>10</b>   | <b>30.3</b> |             |
| <b>UTIs in past 3 months (mean (SD))</b> |                                     |             |             |             |             |             |             |             |
|                                          |                                     | <b>0.3</b>  | <b>0.6</b>  |             |             |             |             |             |
| <b>VUR Status (n, %)</b>                 |                                     |             |             |             |             |             |             | <b>0.79</b> |
|                                          | <b>Never</b>                        | <b>12</b>   | <b>22.2</b> | <b>5</b>    | <b>23.8</b> | <b>7</b>    | <b>21.2</b> |             |
|                                          | <b>Present</b>                      | <b>36</b>   | <b>66.7</b> | <b>13</b>   | <b>61.9</b> | <b>23</b>   | <b>69.7</b> |             |
|                                          | <b>Previously Had, Now Resolved</b> | <b>6</b>    | <b>11.1</b> | <b>3</b>    | <b>14.3</b> | <b>3</b>    | <b>9.1</b>  |             |
| <b>urine_vol (mean (SD))</b>             |                                     |             |             |             |             |             |             | <b>0.75</b> |
|                                          |                                     | <b>16.2</b> | <b>5.4</b>  | <b>16.5</b> | <b>2.9</b>  | <b>16.0</b> | <b>6.5</b>  |             |
| <b>dna_conc (mean (SD))</b>              |                                     |             |             |             |             |             |             | <b>0.02</b> |
|                                          |                                     | <b>9.3</b>  | <b>10.4</b> | <b>5.2</b>  | <b>6.9</b>  | <b>11.9</b> | <b>11.5</b> |             |

516

517

518

519

520

521

522 **Figure 1. Reproducibility of the synthetic long reads for pediatric urine samples.** Each  
 523 sample was sequenced in triplicate. **(A)** Stacked barplots demonstrating overall similarity  
 524 between replicate samples. Each sample (facet) was processed in triplicate (x-axis) and  
 525 demonstrated little variability compared to that seen across samples. **(B)** Variability of relative  
 526 abundance of select bacterial species across replicates. Values shown are average +/- standard  
 527 deviation.

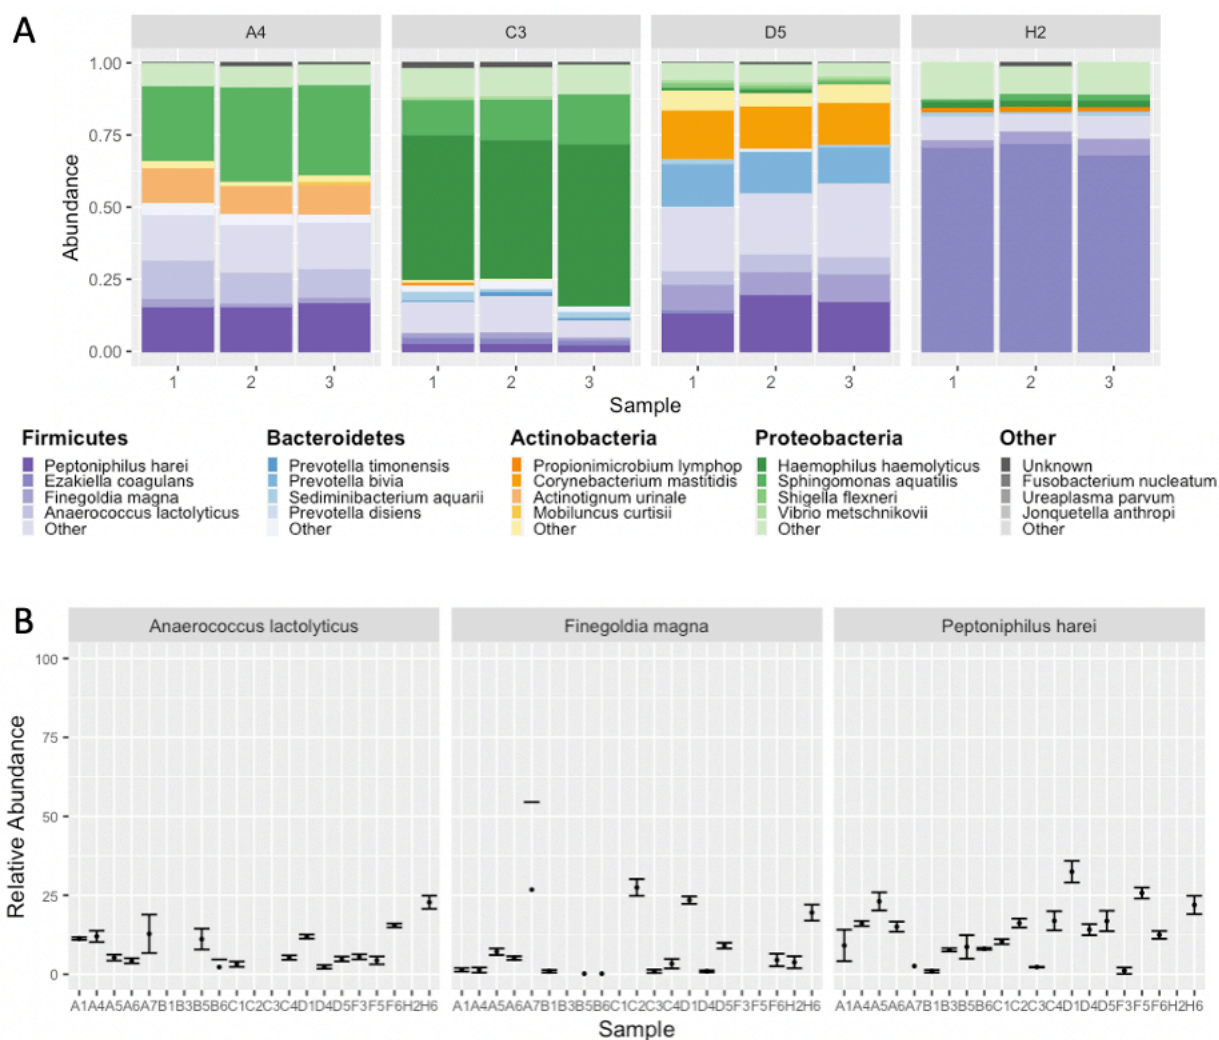

528  
 529  
 530  
 531  
 532  
 533  
 534  
 535

536 **Figure 2.** The pediatric urobiome composition varies by sex and age. We observed that the  
 537 pediatric urobiome is diverse between individuals (A), but there are some overall differences in  
 538 specific taxa between males and females (B). Alpha diversity also demonstrates differences by  
 539 sex, with significant differences in the Observed and Shannon Indices ( $p$  - , C). Diversity also  
 540 has a significant positive correlation with age, which is mostly attributed to males (D).

541

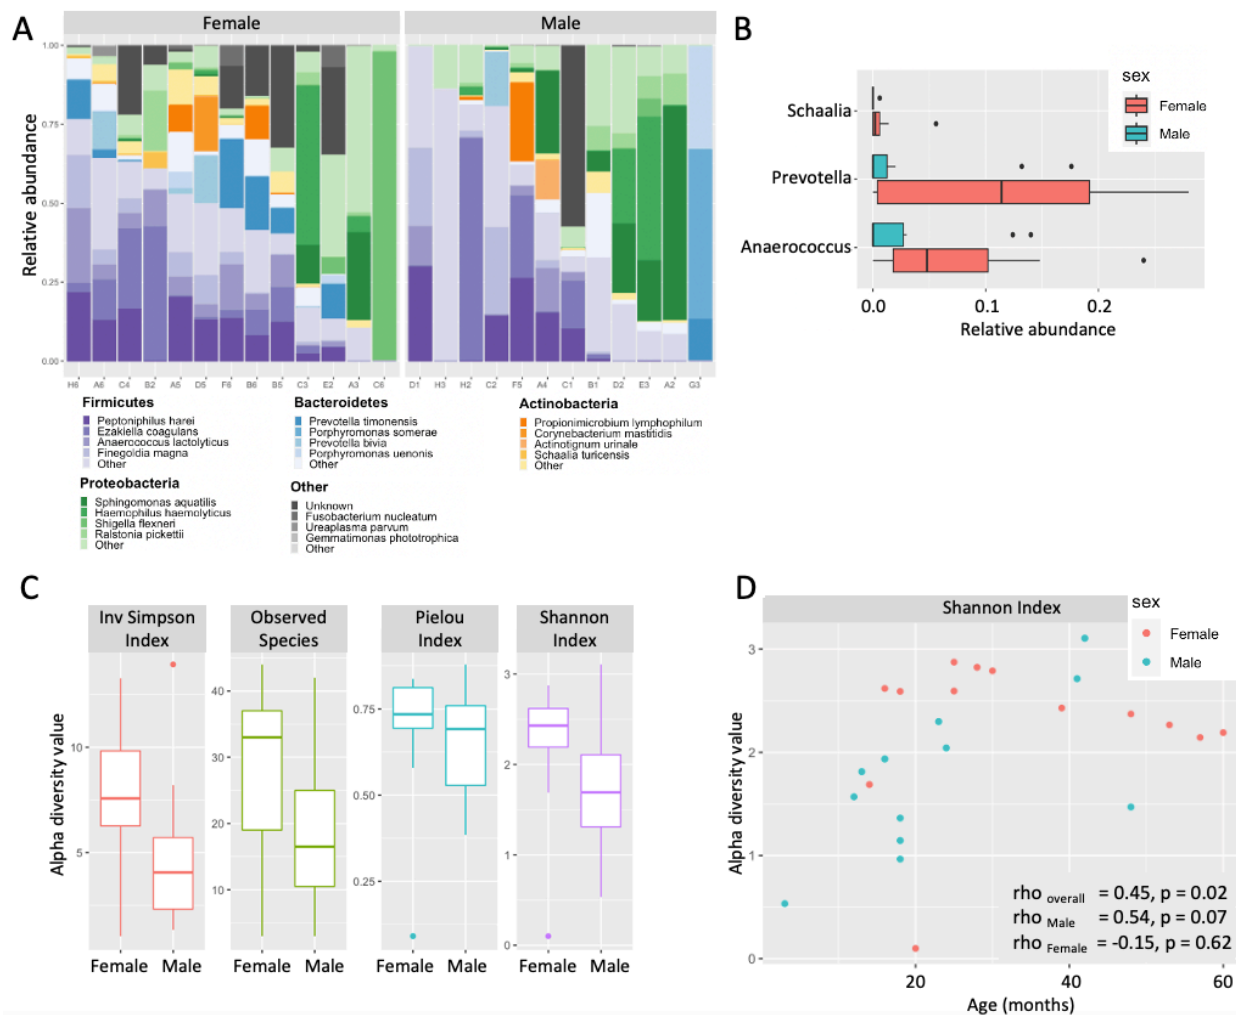

542  
 543  
 544  
 545  
 546  
 547  
 548  
 549

550 **Figure 3.** The pediatric urobiome composition varies by UTI history. (A) We observed that the  
 551 pediatric urobiome is overall less diverse in children with a history of 3 or more UTIs in terms of  
 552 diversity, with significant decreases in diversity as measured by the Inverse Simpson, Shannon,  
 553 and Pielou indices between children with 3 or more UTIs compared to those with history of only  
 554 1 UTI ( $p = 0.03$ ,  $p = 0.05$ , and  $p = 0.01$ , respectively). (B) Three genera demonstrated  
 555 differences based on UTI history: *Lawsonella* (significant decrease between 3+ UTIs compared  
 556 to 1 UTI,  $p = 0.05$ ; decrease between 3+ UTIs compared to 2,  $p = 0.07$ ); *Enterococcus*  
 557 (significant decrease between 2 UTIs and 1 UTIs,  $p = 0.05$ ); and *Corynebacterium* (significant  
 558 decrease between 1 UTI compared to 3+,  $p = 0.05$ ; decrease between 2 UTIs compared to 3+,  
 559  $p = 0.07$ ). (C) Relative abundance of bacterial phyla amongst cohorts of children with history of  
 560 1, 2, 3+ UTI.

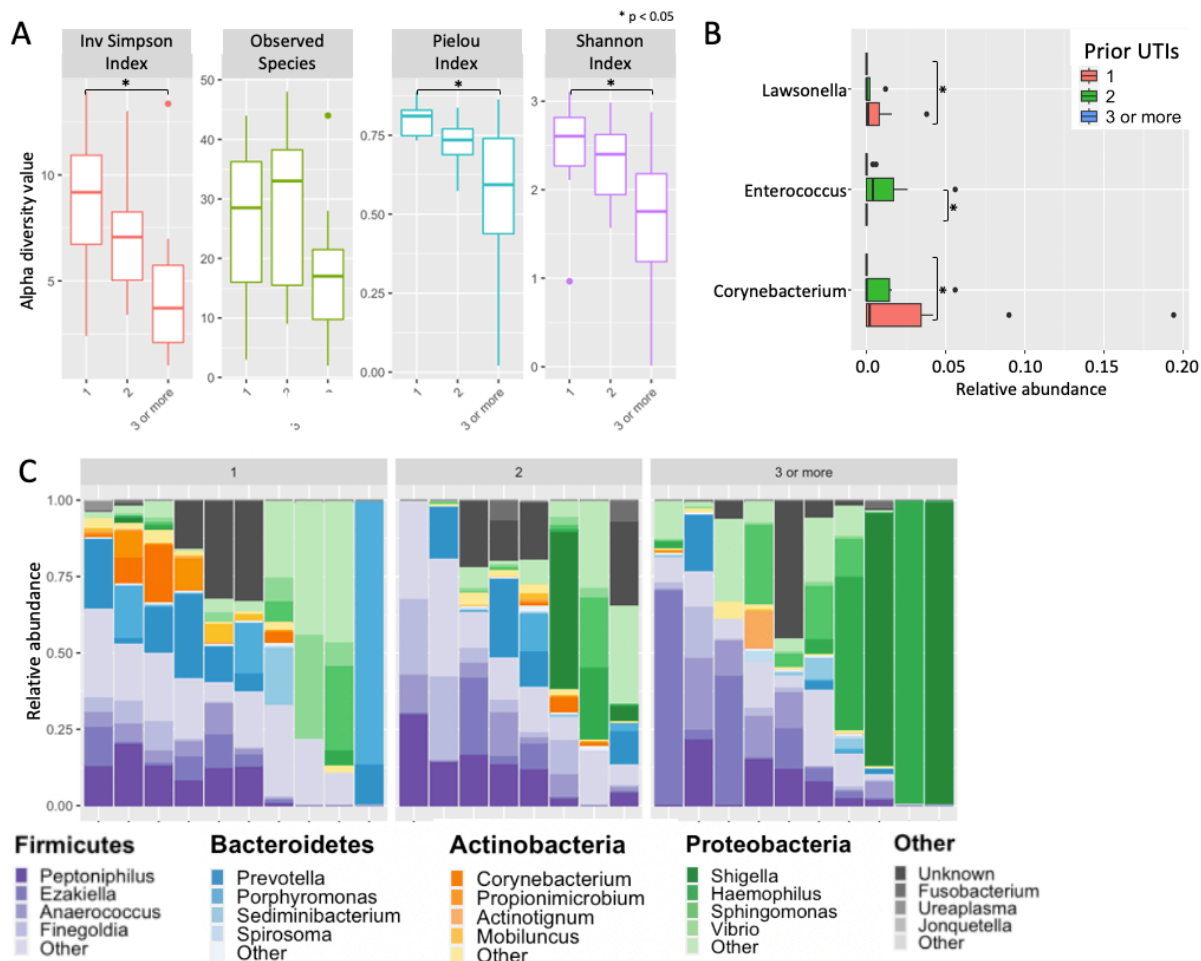

Source: https://www.medrxiv.org/content/10.1101/2024.05.16.24307309v1.full.pdf
